# Supplementary material for: Intake of 7,8-Dihydroxyflavone During Juvenile and Adolescent Stages Prevents Onset of Psychosis in Adult Offspring After Maternal Immune Activation
Source: PubMed Central journal article supplement (PMC5099694; doi:10.1038/srep36087), 2016-11-08
Supplement: srep36087-s1.pdf [file srep36087-s1.pdf]

## Intake of 7,8-Dihydroxyflavone During Juvenile and Adolescent Stages Prevents Onset of Psychosis in Adult Offspring After Maternal Immune Activation

Mei Han<sup>1,2</sup>, Ji-chun Zhang<sup>1</sup>, Wei Yao<sup>1</sup>, Chun Yang<sup>1</sup>, Tamaki Ishima<sup>1</sup>, Qian Ren<sup>1</sup>, Min Ma<sup>1</sup>, Chao Dong<sup>1</sup>, Xu-Feng Huang<sup>2</sup>, and Kenji Hashimoto<sup>\*,1</sup>

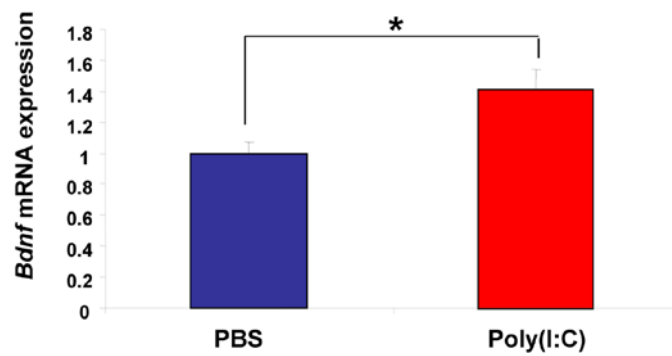

### Supplemental Figure S1.

Expression of *Bdnf* mRNA in the PFC of offspring from control (n =10) and poly(I:C)-treated mice (n=14). The data show the mean +/- S.E.M. \*P <0.05 (Student t-test)
